# Supplementary material for: Comparison of Scaffolds Fabricated via 3D Printing and Salt Leaching: In Vivo Imaging, Biodegradation, and Inflammation
Source: MDPI journal article supplement (doi:10.3390/polym12102210), 2020-09-26
Supplement: s1 [file s1]

Supplementary Files

# Comparison of Scaffolds Fabricated via 3D Printing and Salt Leaching: In-vivo Imaging, Biodegradation, and Inflammation

Doo Yeon Kwon, Joon Yeong Park, Bun Yeoul Lee, Moon Suk Kim\*

<sup>1</sup> Department of Molecular Science and Technology, Ajou University, Suwon, Korea; kdy@ajou.ac.kr (D.Y.K.); pjy16@ajou.ac.kr (J.Y.P.); bunyeoul@ajou.ac.kr (B.Y.L.)

\* Correspondence; moonskim@ajou.ac.kr (M.S.K.); Tel.: +82-31-219-2608 (M.S.K.)

† Doo Yeon Kwon and Joon Yeong Park are equal first authors.

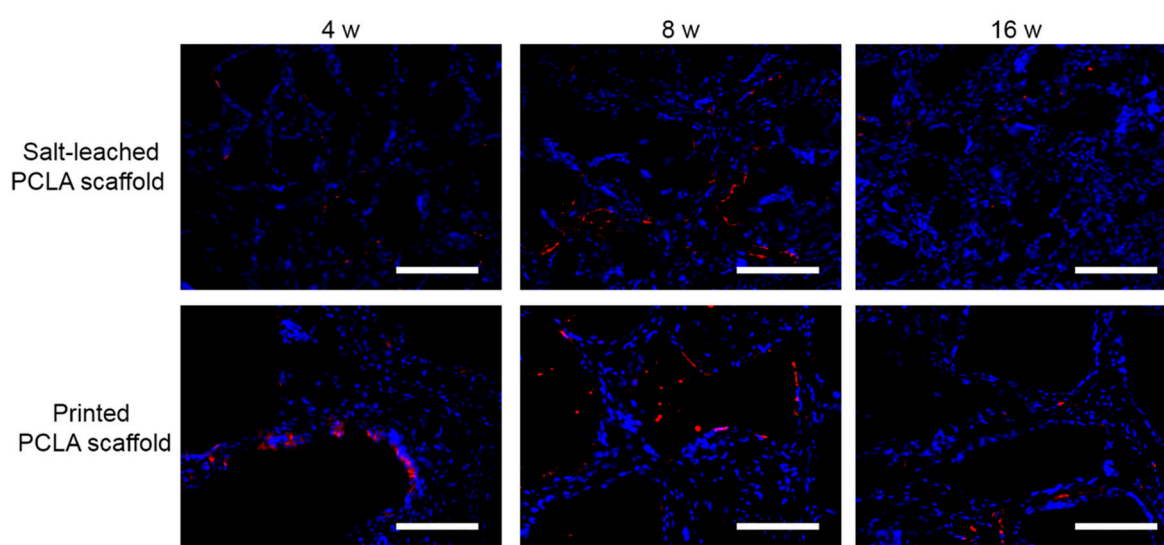

**Figure S1.** Immunofluorescence ED1 staining images on salt-leached and printed PCLA scaffolds four, eight, and sixteen weeks after implantation. Scale bars = 100  $\mu$ m.
